# Supplementary material for: TFAP2C promotes stemness and chemotherapeutic resistance in colorectal cancer via inactivating hippo signaling pathway
Source: Springer Nature journal article supplement (doi:10.1186/s13046-018-0683-9), 2018-02-13
Supplement: MOESM1 [file 15462796]

**Table S1. The basic information of 8 colorectal cancer patients for TFAP2C mRNA and protein expression analysis.**

|          |           | Cases (n) | Percentage (%) |
|----------|-----------|-----------|----------------|
| Location | Colon     | 4         | 50.0           |
|          | Rectum    | 4         | 50.0           |
| Gender   | Male      | 4         | 50.0           |
|          | Female    | 4         | 50.0           |
| Age      | ≤60       | 3         | 37.5           |
|          | >60       | 5         | 62.5           |
| Grade    | G1        | 0         | 0.0            |
|          | G2        | 8         | 100.0          |
|          | G3        | 0         | 0.0            |
| Stage    | Stage I   | 2         | 25.0           |
|          | Stage II  | 2         | 25.0           |
|          | Stage III | 4         | 50.0           |
|          | Stage IV  | 0         | 0.0            |
