# Supplementary material for: TFAP2C promotes stemness and chemotherapeutic resistance in colorectal cancer via inactivating hippo signaling pathway
Source: Springer Nature journal article supplement (doi:10.1186/s13046-018-0683-9), 2018-02-13
Supplement: MOESM2 [file 15462796]

**Table S2. The basic information of 378 patients with colorectal cancer for TFAP2C immunohistochemical staining analysis.**

|                           |               | Cases (n) | Percentage (%) |
|---------------------------|---------------|-----------|----------------|
| Location                  | Colon         | 118       | 31.2           |
|                           | Rectum        | 260       | 68.8           |
| Gender                    | Male          | 169       | 44.7           |
|                           | Female        | 209       | 55.3           |
| Age                       | ≤60           | 133       | 35.2           |
|                           | >60           | 245       | 64.8           |
| Grade                     | G1            | 34        | 9.0            |
|                           | G2            | 307       | 81.2           |
|                           | G3            | 37        | 9.8            |
| T classification          | T1            | 13        | 3.4            |
|                           | T2            | 66        | 17.5           |
|                           | T3            | 266       | 70.4           |
|                           | T4            | 33        | 8.7            |
| N classification          | N0            | 218       | 57.7           |
|                           | N1            | 101       | 26.7           |
|                           | N2            | 59        | 15.6           |
| M classification          | M0            | 331       | 87.6           |
|                           | M1            | 47        | 12.4           |
| Stage                     | Stage I       | 68        | 18.0           |
|                           | Stage II      | 145       | 38.4           |
|                           | Stage III     | 118       | 31.2           |
|                           | Stage IV      | 47        | 12.4           |
| Chemotherapeutic response | Sensitivity   | 39        | 23.6           |
|                           | Resistance    | 36        | 21.8           |
| (Excluded Stage I/II)     | Not available | 90        | 54.5           |
