# Supplementary material for: TFAP2C promotes stemness and chemotherapeutic resistance in colorectal cancer via inactivating hippo signaling pathway
Source: Springer Nature journal article supplement (doi:10.1186/s13046-018-0683-9), 2018-02-13
Supplement: MOESM3 [file 15462796]

**Table 3. A list of primers used in the reactions for real-time RT-PCR.**

| Gene              | Sequence (5'– 3')        |
|-------------------|--------------------------|
| TFAP2C-up         | TCAGTCCCTGGAAGATTGTCG    |
| TFAP2C -dn        | CCAGTAACGAGGCATTTAAGCA   |
| GAPDH-up          | TCCTCTGACTTCAACAGCGACAC  |
| GAPDH-dn          | CACCCTGTTGCTGTAGCCAAATTC |
| ROCK1-Point-1#-up | AAGAGAACAGCGCTACTCACC    |
| ROCK1-Point-1#-dn | CACAGCAGCAGCAACATGTC     |
| ROCK1-Point-2#-up | GGTCCCCGTCCCGAGATG       |
| ROCK1-Point-2#-dn | TCACCCGCCCTTTGCTTTC      |
| ROCK1-Point-3#-up | TGCTGATGGGGGAGCTTCTG     |
| ROCK1-Point-3#-dn | CGGCGGTCTCCGTTTGTGTTGA   |
| ROCK1-Point-4#-up | GCAGCCAGTCCAGAGACTTC     |
| ROCK1-Point-4#-dn | AAACGCCACTGGTGCTCAATG    |
| ROCK2-Point-1#-up | GCGGCTCTTTGTCATGTACCC    |
| ROCK2-Point-1#-dn | TGGCCATGCTTCATACACCAG    |
| ROCK2-Point-2#-up | CTCCTCGCGCTCAGGTCCC      |
| ROCK2-Point-2#-dn | GGGACGCCGTCTGTTCCC       |
| ROCK2-Point-3#-up | GGACCCCGCGGACTACCC       |
| ROCK2-Point-3#-dn | TGAGGCGAGGCCCGCATA       |
| ROCK2-Point-4#-up | CAGCAGGGCTATTCACAATGTTC  |
| ROCK2-Point-4#-dn | GTCTGCATACCTGCCAGGATTC   |
| ROCK1-up          | GGTGGTCGGTTGGGGTATTTT    |
| ROCK1-dn          | CGCCCTAACCTCACTTCCC      |
| ROCK2-up          | TCAGAGGTCTACAGATGAAGGC   |
| ROCK2-dn          | CCAGGGGCTATTGGCAAAGG     |
| CTGF-up           | TGGAGATTTTGGGAGTACGG     |

|           |                         |
|-----------|-------------------------|
| CTGF-dn   | CAGGCTAGAGAAGCAGAGCC    |
| CYR61-up  | GGTCAAAGTTACCGGGCAGT    |
| CYR61-dn  | GGAGGCATCGAATCCCAGC     |
| HOXA1-up  | TCCTGGAATACCCATACTTAGC  |
| HOXA1-dn  | GCACGACTGGAAAGTTGTAATCC |
| SOX9-up   | AGCGAACGCACATCAAGAC     |
| SOX9-dn   | CTGTAGGCGATCTGTTGGGG    |
| NANOG-up  | TCCAACATCCTGAACCTCAGCTA |
| NANOG-dn  | AGTCGGGTTCCACCAGGCATC   |
| SOX2-up   | GTGAGCGCCCTGCAGTACAA    |
| SOX2-dn   | GCGAGTAGGACATGCTGTAGGTG |
| OCT4-up   | TGAAGCTGGAGAAGGAGAAGCTG |
| OCT4-dn   | GCAGATGGTCGTTTGGCTGA    |
| BMI-1-up  | TCGTTGTTCGATGCATTTCT    |
| BMI-1-dn  | CTTTCATTGTCTTTTCCGCC    |
| RPL13A-up | GCCATCGTGGCTAAACAGGTA   |
| RPL13A-dn | GTTGGTGTTCATCCGCTTGC    |
| PPIA-up   | GGCAAATGCTGGACCCAACACA  |
| PPIA-dn   | TGCTGGTCTTGCCATTCCTGGA  |
