# Supplementary material for: TFAP2C promotes stemness and chemotherapeutic resistance in colorectal cancer via inactivating hippo signaling pathway
Source: Springer Nature journal article supplement (doi:10.1186/s13046-018-0683-9), 2018-02-13
Supplement: MOESM4 [file 15462796]

**Table S4. A list of primers used in the reactions for clone PCR.**

| Gene              | Sequence (5' – 3')                                                   |
|-------------------|----------------------------------------------------------------------|
| TFAP2C-full-up    | ATGTTGTGGAAAATAACCGATAATG                                            |
| TFAP2C-full-dn    | TTATTTCTGTGTTTCTCCATTTTC                                             |
| ROCK1-Pro-luci-up | CCCCGTCTTCCCCTCACTG                                                  |
| ROCK1-Pro-luci-dn | GCGATCAGAAGCAGCCAGAG                                                 |
| ROCK2-Pro-luci-up | AGCAAGCTCTCCACGTTGATG                                                |
| ROCK2-Pro-luci-dn | GCTCGGTCGCTATTATTTGGGC                                               |
| shTFAP2C-1#-up    | GATCCCCGCCAGCAACTGTGTAAAGAATTCAAGAG<br>ATTCTTTACACAGTTGCTGGGCTTTTTA  |
| shTFAP2C-1#-dn    | AGCTTAAAAAGCCCAGCAACTGTGTAAAGAATCTCT<br>TGAATTCTTTACACAGTTGCTGGGCGGG |
| shTFAP2C-2#-up    | GATCCCCTGTTACCTACCTTACTATTTATTCAAGAGAT<br>AAATAGTAAGGTAGGTAACATTTTTA |
| shTFAP2C-2#-dn    | AGCTTAAAAATGTTACCTACCTTACTATTTATCTCTTG<br>AATAAATAGTAAGGTAGGTAACAGGG |
