# Supplementary material for: TFAP2C promotes stemness and chemotherapeutic resistance in colorectal cancer via inactivating hippo signaling pathway
Source: Springer Nature journal article supplement (doi:10.1186/s13046-018-0683-9), 2018-02-13
Supplement: MOESM5 [file 15462796]

**Table S5. The relationship between TFAP2C IHC expression level and clinical pathological characteristics in 378 patients with colorectal cancer.**

| Parameters       | Number of cases | TFAP2C IHC expression |      | P values |
|------------------|-----------------|-----------------------|------|----------|
|                  |                 | Low                   | High |          |
| Location         |                 | 190                   | 188  |          |
| ADC              | 118             | 54                    | 64   | 0.238    |
| SQC              | 260             | 136                   | 124  |          |
| Gender           |                 |                       |      |          |
| Male             | 169             | 79                    | 90   | 0.216    |
| Female           | 209             | 111                   | 98   |          |
| Age              |                 |                       |      |          |
| <60              | 133             | 70                    | 63   | 0.460    |
| ≥60              | 245             | 120                   | 125  |          |
| Grade            |                 |                       |      |          |
| G1-G2            | 341             | 175                   | 166  | 0.213    |
| G3               | 37              | 15                    | 22   |          |
| T classification |                 |                       |      |          |
| T1-2             | 79              | 51                    | 28   | 0.004*   |
| T3-4             | 299             | 139                   | 160  |          |
| N classification |                 |                       |      |          |
| N0               | 218             | 131                   | 87   | <0.001*  |
| N1-2             | 160             | 59                    | 101  |          |
| M classification |                 |                       |      |          |
| M0               | 331             | 176                   | 155  | 0.003*   |
| M1               | 47              | 14                    | 33   |          |
| Stage            |                 |                       |      |          |
| I-II             | 213             | 128                   | 85   | <0.001*  |
| III-IV           | 165             | 62                    | 103  |          |

Chemotherapeutic

response

Sensitivity 39 21 18 0.011\*

Resistance 36 9 27

---
