# Supplementary material for: TFAP2C promotes stemness and chemotherapeutic resistance in colorectal cancer via inactivating hippo signaling pathway
Source: Springer Nature journal article supplement (doi:10.1186/s13046-018-0683-9), 2018-02-13
Supplement: MOESM10 [file 15462796]

## Supplemental Figure 5

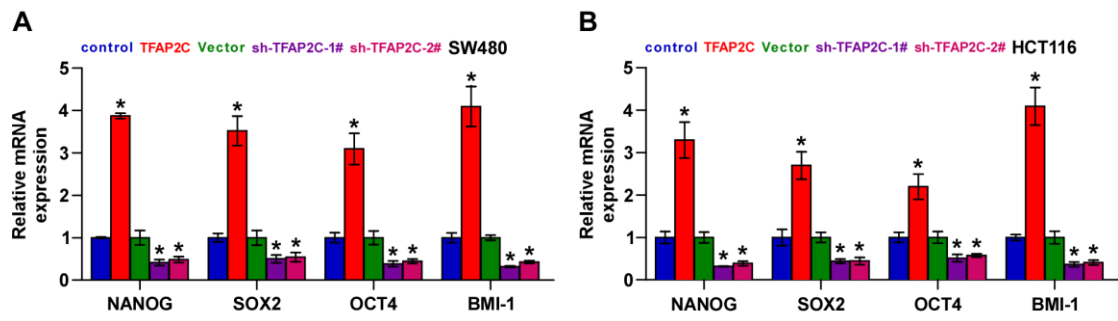

**C**

|                     | Cell number inoculated |                 |                 |                 |
|---------------------|------------------------|-----------------|-----------------|-----------------|
|                     | $1 \times 10^6$        | $1 \times 10^5$ | $1 \times 10^4$ | $1 \times 10^3$ |
| HCT116 Control      | 6/6                    | 4/6             | 2/6             | 0/6             |
| HCT116 TFAP2C       | 6/6                    | 6/6             | 5/6             | 3/6             |
| HCT116 Vector       | 6/6                    | 5/6             | 2/6             | 0/6             |
| HCT116 sh-TFAP2C-1# | 6/6                    | 3/6             | 0/6             | 0/6             |
| HCT116 sh-TFAP2C-2# | 6/6                    | 2/6             | 0/6             | 0/6             |
