# Supplementary material for: TFAP2C promotes stemness and chemotherapeutic resistance in colorectal cancer via inactivating hippo signaling pathway
Source: Springer Nature journal article supplement (doi:10.1186/s13046-018-0683-9), 2018-02-13

## Supplemental Figure 6

**A**

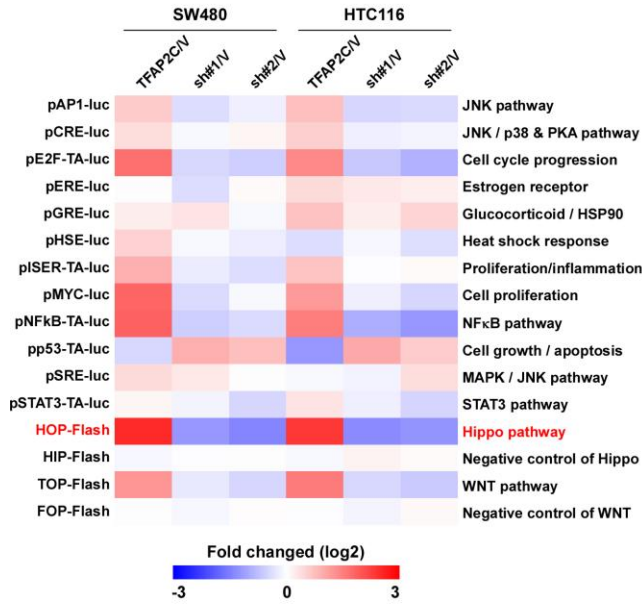

**B**

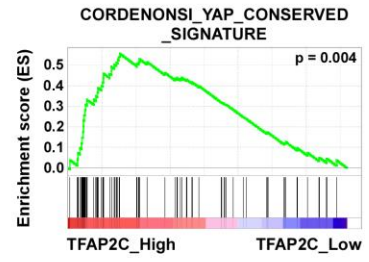

**C**

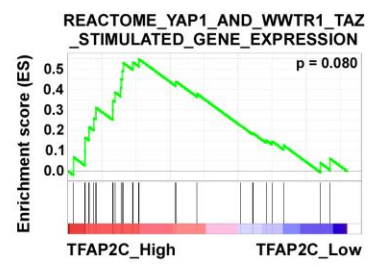

**D**

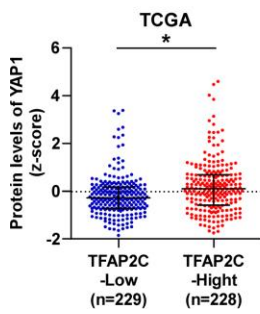

**E**

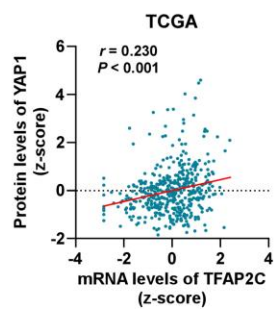

**F**

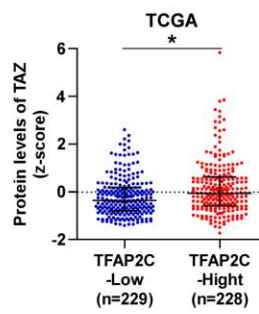

**G**

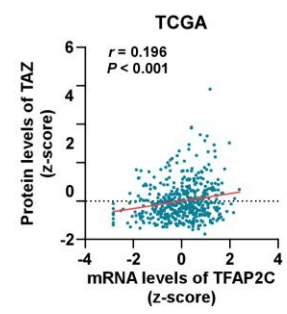

Supplement: MOESM11 [file 15462796]
