# Supplementary material for: TFAP2C promotes stemness and chemotherapeutic resistance in colorectal cancer via inactivating hippo signaling pathway
Source: Springer Nature journal article supplement (doi:10.1186/s13046-018-0683-9), 2018-02-13

## Supplemental Figure 8

**A**

| There are 2 putative sites were predicted in ROCK1 promoter by JASPAR (chr6:18,690,100 - 18,692,700,Relative profile score threshold:90%) |        |       |            |                         |
|-------------------------------------------------------------------------------------------------------------------------------------------|--------|-------|------------|-------------------------|
| Modle ID                                                                                                                                  | Strand | Score | Start      | Predicted site sequence |
| MA0524.2                                                                                                                                  | -      | 12.21 | 18,691,265 | TGCCCGGAGGGA            |
| MA0524.2                                                                                                                                  | -      | 12.06 | 18,691,690 | ACCCCCAGGCA             |

**B**

| There are 3 putative sites were predicted in ROCK2 promoter by JASPAR (chr6:11,482,400 - 11,486,050,Relative profile score threshold:90%) |        |       |            |                         |
|-------------------------------------------------------------------------------------------------------------------------------------------|--------|-------|------------|-------------------------|
| Modle ID                                                                                                                                  | Strand | Score | Start      | Predicted site sequence |
| MA0524.2                                                                                                                                  | -      | 10.17 | 11,484,312 | GGCCCCGAGGCT            |
| MA0524.2                                                                                                                                  | -      | 12.10 | 11,484,418 | AGCCCCAGGCG             |
| MA0524.2                                                                                                                                  | -      | 10.68 | 11,485,092 | CGCCTCGGGGCC            |

**C**

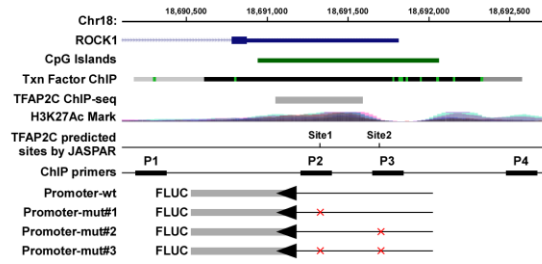

**D**

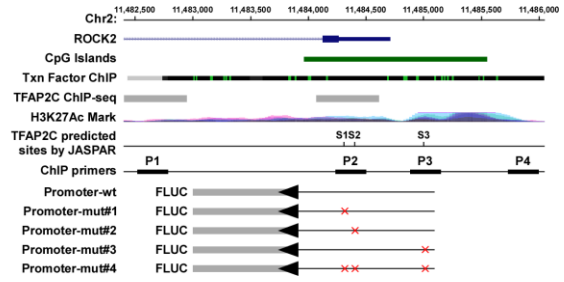

Supplement: MOESM13 [file 15462796]
