# Supplementary material for: TFAP2C promotes stemness and chemotherapeutic resistance in colorectal cancer via inactivating hippo signaling pathway
Source: Springer Nature journal article supplement (doi:10.1186/s13046-018-0683-9), 2018-02-13

## Supplemental Figure 11

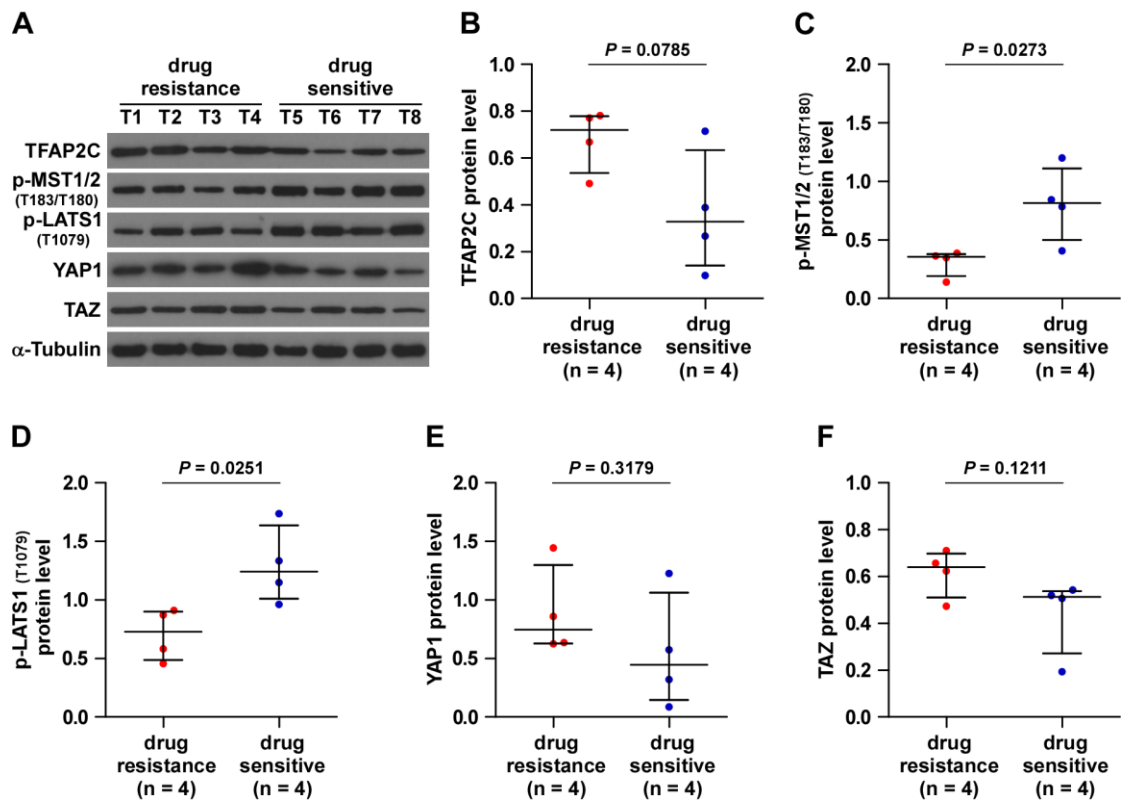

Supplement: MOESM16 [file 15462796]
